# Supplementary material for: A survey of footwear advice, beliefs and wear habits in people with knee osteoarthritis
Source: Springer Nature journal article supplement (doi:10.1186/s13047-014-0043-8), 2014-01-01
Supplement: MOESM1 [file 7114288]

6. Place a tick on the following scale to show the average amount of pain felt over the PAST WEEK in your osteoarthritic knee when you are walking (if you have symptoms in both knees please only indicate the pain in your most painful knee):

|                          |                          |                          |                          |                          |                          |                          |                          |                          |                          |                          |                     |
|--------------------------|--------------------------|--------------------------|--------------------------|--------------------------|--------------------------|--------------------------|--------------------------|--------------------------|--------------------------|--------------------------|---------------------|
| <input type="checkbox"/> | <input type="checkbox"/> | <input type="checkbox"/> | <input type="checkbox"/> | <input type="checkbox"/> | <input type="checkbox"/> | <input type="checkbox"/> | <input type="checkbox"/> | <input type="checkbox"/> | <input type="checkbox"/> | <input type="checkbox"/> |                     |
| 0                        | 1                        | 2                        | 3                        | 4                        | 5                        | 6                        | 7                        | 8                        | 9                        | 10                       |                     |
| no pain                  |                          |                          |                          |                          |                          |                          |                          |                          |                          |                          | worst pain possible |

**Part 2 – Advice you have been given about footwear for your knee osteoarthritis**

7. Have you ever received advice about what footwear or footwear features (e.g. high heels) you should or should not wear for your knee osteoarthritis from a health professional?

Yes

No

If no, go to question 9

8. If you have received advice about footwear for your knee osteoarthritis, which health professional(s) provided this advice (select all that apply):

|                                                 |                                                                                         |                                               |
|-------------------------------------------------|-----------------------------------------------------------------------------------------|-----------------------------------------------|
| Podiatrist <input type="checkbox"/>             | Physiotherapist <input type="checkbox"/>                                                | General practitioner <input type="checkbox"/> |
| Rheumatologist <input type="checkbox"/>         | Surgeon <input type="checkbox"/>                                                        | Sports physician <input type="checkbox"/>     |
| Occupational therapist <input type="checkbox"/> | Exercise physiologist / exercise instructor / personal trainer <input type="checkbox"/> | Chiropractor <input type="checkbox"/>         |
| Osteopath <input type="checkbox"/>              |                                                                                         |                                               |
| Other (please describe):                        | <input type="text"/>                                                                    |                                               |

9. Have you ever received advice about what footwear or footwear features you should or should not wear for your knee osteoarthritis from a **NON-health professional** (e.g. a friend)?

Yes

No

If no, go to question 11

10. If you have received advice about footwear for your knee osteoarthritis from a **NON-health professional**, who provided this advice (select all that apply):

|                                            |                                        |                                    |
|--------------------------------------------|----------------------------------------|------------------------------------|
| Friend <input type="checkbox"/>            | Family member <input type="checkbox"/> | Internet <input type="checkbox"/>  |
| Footwear retailer <input type="checkbox"/> | Media <input type="checkbox"/>         | Colleague <input type="checkbox"/> |
| Other (please describe):                   |                                        |                                    |

11. Have you ever been told that any of the following footwear choices will be **good or bad** for your knee osteoarthritis (you may select more than one option):

|                                             | Bad                      | Good                     | No advice given          |
|---------------------------------------------|--------------------------|--------------------------|--------------------------|
| Athletic shoes/sneakers                     | <input type="checkbox"/> | <input type="checkbox"/> | <input type="checkbox"/> |
| Cushioned shoes                             | <input type="checkbox"/> | <input type="checkbox"/> | <input type="checkbox"/> |
| Sturdy/supportive shoes                     | <input type="checkbox"/> | <input type="checkbox"/> | <input type="checkbox"/> |
| Flexible thin soled shoes                   | <input type="checkbox"/> | <input type="checkbox"/> | <input type="checkbox"/> |
| Hard-soled shoes                            | <input type="checkbox"/> | <input type="checkbox"/> | <input type="checkbox"/> |
| Shoes with in-built arch supports           | <input type="checkbox"/> | <input type="checkbox"/> | <input type="checkbox"/> |
| Lace up oxford or similar-style men's shoes | <input type="checkbox"/> | <input type="checkbox"/> | <input type="checkbox"/> |
| Work boots (lace up or slip on)             | <input type="checkbox"/> | <input type="checkbox"/> | <input type="checkbox"/> |



**13. How much do you feel that wearing each of the different types of footwear below could be good for your knee osteoarthritis symptoms (please indicate one response for each type):**

|                                             | Strongly agree                | Agree                         | Neither agree or disagree     | Disagree                      | Strongly disagree             | Don't know                    |
|---------------------------------------------|-------------------------------|-------------------------------|-------------------------------|-------------------------------|-------------------------------|-------------------------------|
| Athletic shoes/sneakers                     | <input type="checkbox"/><br>0 | <input type="checkbox"/><br>1 | <input type="checkbox"/><br>2 | <input type="checkbox"/><br>3 | <input type="checkbox"/><br>4 | <input type="checkbox"/><br>5 |
| Cushioned shoes                             | <input type="checkbox"/><br>0 | <input type="checkbox"/><br>1 | <input type="checkbox"/><br>2 | <input type="checkbox"/><br>3 | <input type="checkbox"/><br>4 | <input type="checkbox"/><br>5 |
| Sturdy/supportive shoes                     | <input type="checkbox"/><br>0 | <input type="checkbox"/><br>1 | <input type="checkbox"/><br>2 | <input type="checkbox"/><br>3 | <input type="checkbox"/><br>4 | <input type="checkbox"/><br>5 |
| Flexible thin soled shoes                   | <input type="checkbox"/><br>0 | <input type="checkbox"/><br>1 | <input type="checkbox"/><br>2 | <input type="checkbox"/><br>3 | <input type="checkbox"/><br>4 | <input type="checkbox"/><br>5 |
| Hard-soled shoes                            | <input type="checkbox"/><br>0 | <input type="checkbox"/><br>1 | <input type="checkbox"/><br>2 | <input type="checkbox"/><br>3 | <input type="checkbox"/><br>4 | <input type="checkbox"/><br>5 |
| Shoes with in-built arch supports           | <input type="checkbox"/><br>0 | <input type="checkbox"/><br>1 | <input type="checkbox"/><br>2 | <input type="checkbox"/><br>3 | <input type="checkbox"/><br>4 | <input type="checkbox"/><br>5 |
| Lace up oxford or similar-style men's shoes | <input type="checkbox"/><br>0 | <input type="checkbox"/><br>1 | <input type="checkbox"/><br>2 | <input type="checkbox"/><br>3 | <input type="checkbox"/><br>4 | <input type="checkbox"/><br>5 |
| Work boots (lace up or slip on)             | <input type="checkbox"/><br>0 | <input type="checkbox"/><br>1 | <input type="checkbox"/><br>2 | <input type="checkbox"/><br>3 | <input type="checkbox"/><br>4 | <input type="checkbox"/><br>5 |
| High heeled shoes                           | <input type="checkbox"/><br>0 | <input type="checkbox"/><br>1 | <input type="checkbox"/><br>2 | <input type="checkbox"/><br>3 | <input type="checkbox"/><br>4 | <input type="checkbox"/><br>5 |
| Flat shoes                                  | <input type="checkbox"/><br>0 | <input type="checkbox"/><br>1 | <input type="checkbox"/><br>2 | <input type="checkbox"/><br>3 | <input type="checkbox"/><br>4 | <input type="checkbox"/><br>5 |

|                       |                               |                               |                               |                               |                               |                               |
|-----------------------|-------------------------------|-------------------------------|-------------------------------|-------------------------------|-------------------------------|-------------------------------|
| Slip on style shoes   | <input type="checkbox"/><br>0 | <input type="checkbox"/><br>1 | <input type="checkbox"/><br>2 | <input type="checkbox"/><br>3 | <input type="checkbox"/><br>4 | <input type="checkbox"/><br>5 |
| Slippers              | <input type="checkbox"/><br>0 | <input type="checkbox"/><br>1 | <input type="checkbox"/><br>2 | <input type="checkbox"/><br>3 | <input type="checkbox"/><br>4 | <input type="checkbox"/><br>5 |
| Sandals               | <input type="checkbox"/><br>0 | <input type="checkbox"/><br>1 | <input type="checkbox"/><br>2 | <input type="checkbox"/><br>3 | <input type="checkbox"/><br>4 | <input type="checkbox"/><br>5 |
| Clogs or 'cros'       | <input type="checkbox"/><br>0 | <input type="checkbox"/><br>1 | <input type="checkbox"/><br>2 | <input type="checkbox"/><br>3 | <input type="checkbox"/><br>4 | <input type="checkbox"/><br>5 |
| Thongs/flip flops     | <input type="checkbox"/><br>0 | <input type="checkbox"/><br>1 | <input type="checkbox"/><br>2 | <input type="checkbox"/><br>3 | <input type="checkbox"/><br>4 | <input type="checkbox"/><br>5 |
| Buckled shoes         | <input type="checkbox"/><br>0 | <input type="checkbox"/><br>1 | <input type="checkbox"/><br>2 | <input type="checkbox"/><br>3 | <input type="checkbox"/><br>4 | <input type="checkbox"/><br>5 |
| Velcro-fastened shoes | <input type="checkbox"/><br>0 | <input type="checkbox"/><br>1 | <input type="checkbox"/><br>2 | <input type="checkbox"/><br>3 | <input type="checkbox"/><br>4 | <input type="checkbox"/><br>5 |
| Above ankle boots     | <input type="checkbox"/><br>0 | <input type="checkbox"/><br>1 | <input type="checkbox"/><br>2 | <input type="checkbox"/><br>3 | <input type="checkbox"/><br>4 | <input type="checkbox"/><br>5 |
| Barefoot              | <input type="checkbox"/><br>0 | <input type="checkbox"/><br>1 | <input type="checkbox"/><br>2 | <input type="checkbox"/><br>3 | <input type="checkbox"/><br>4 | <input type="checkbox"/><br>5 |
